# Supplementary material for: Loss-of-function of the ciliopathy protein Cc2d2a disorganizes the vesicle fusion machinery at the periciliary membrane and indirectly affects Rab8-trafficking in zebrafish photoreceptors
Source: PubMed Central journal article supplement (PMC5760100; doi:10.1371/journal.pgen.1007150), 2017-12-27

S3 Fig. Accumulated vesicles in *cc2d2a*<sup>-/-</sup> PRs at 3 dpf contain opsin

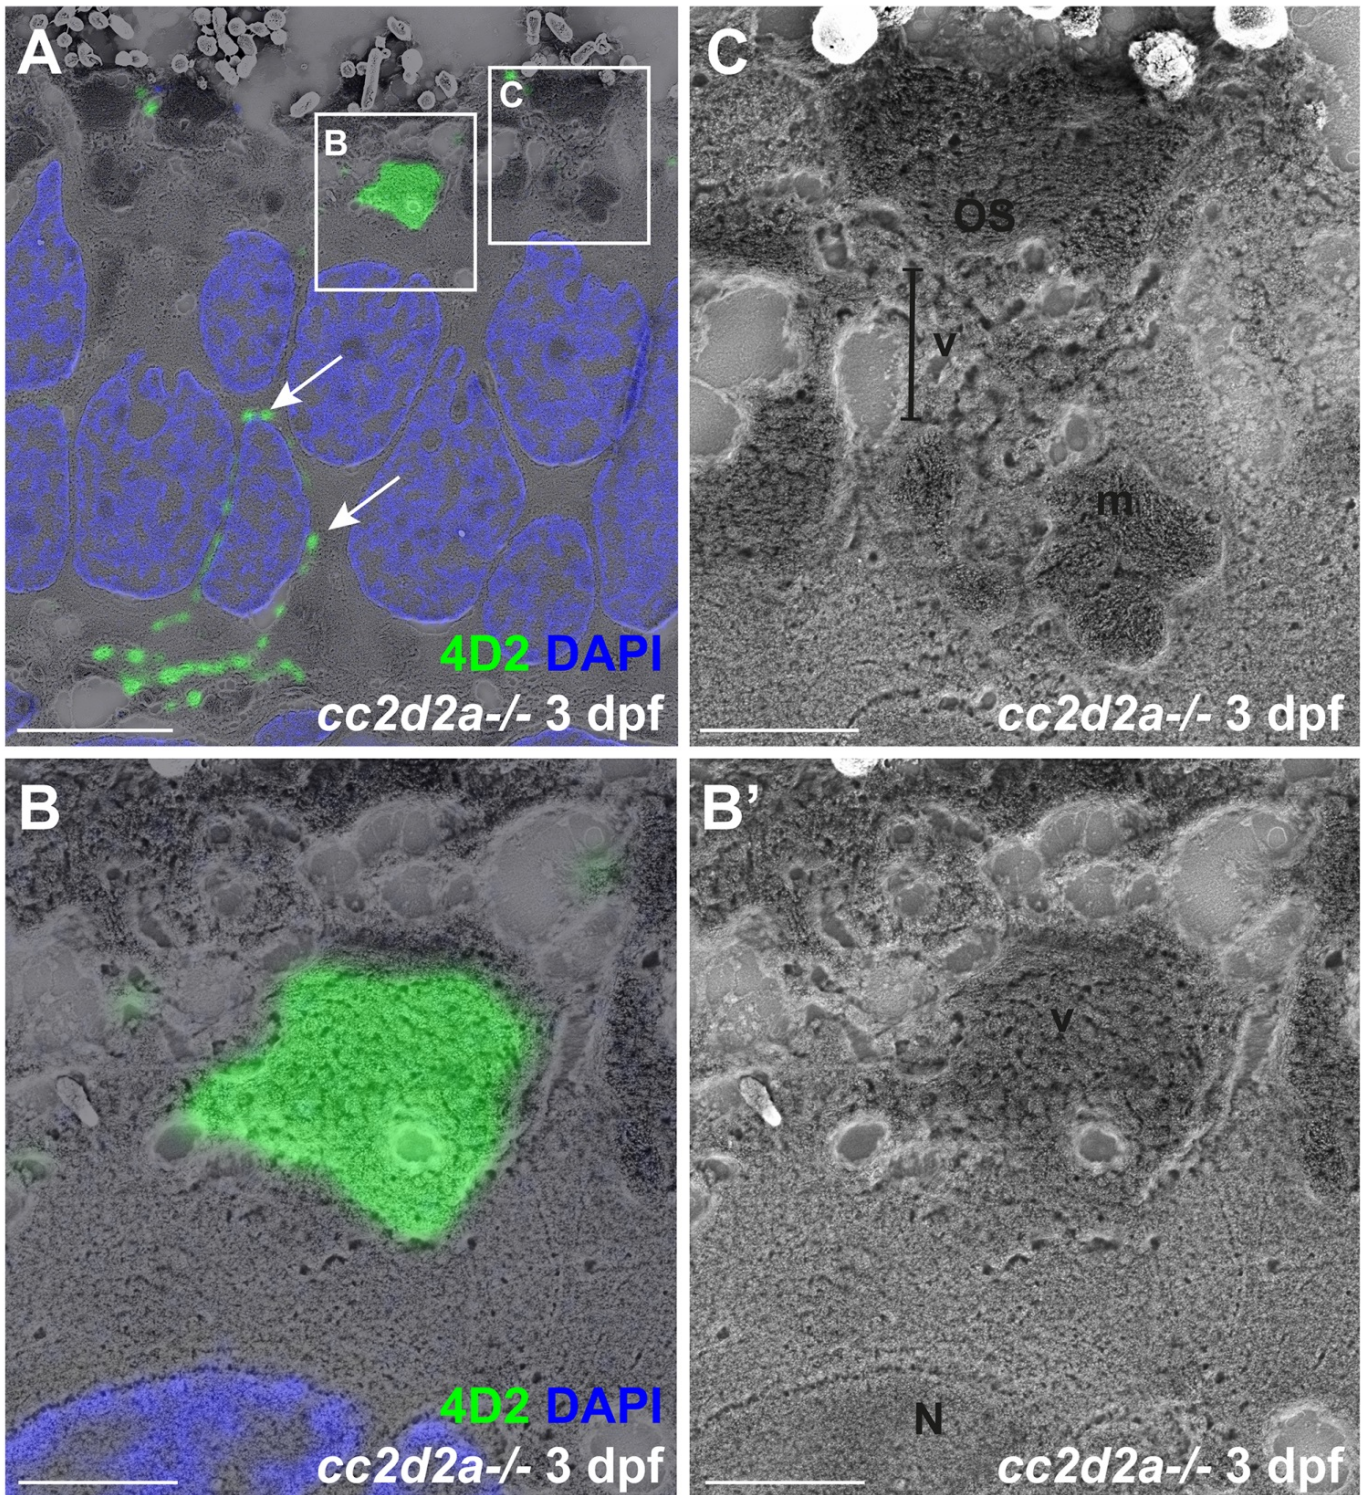

Supplement: pgen.1007150.s011.pdf [file pgen.1007150.s011.pdf]
