# Supplementary material for: Loss-of-function of the ciliopathy protein Cc2d2a disorganizes the vesicle fusion machinery at the periciliary membrane and indirectly affects Rab8-trafficking in zebrafish photoreceptors
Source: PubMed Central journal article supplement (PMC5760100; doi:10.1371/journal.pgen.1007150), 2017-12-27

S4 Fig. Polarized trafficking of transmembrane proteins not targeted to cilium occurs normally in *cc2d2a*<sup>-/-</sup> PRs

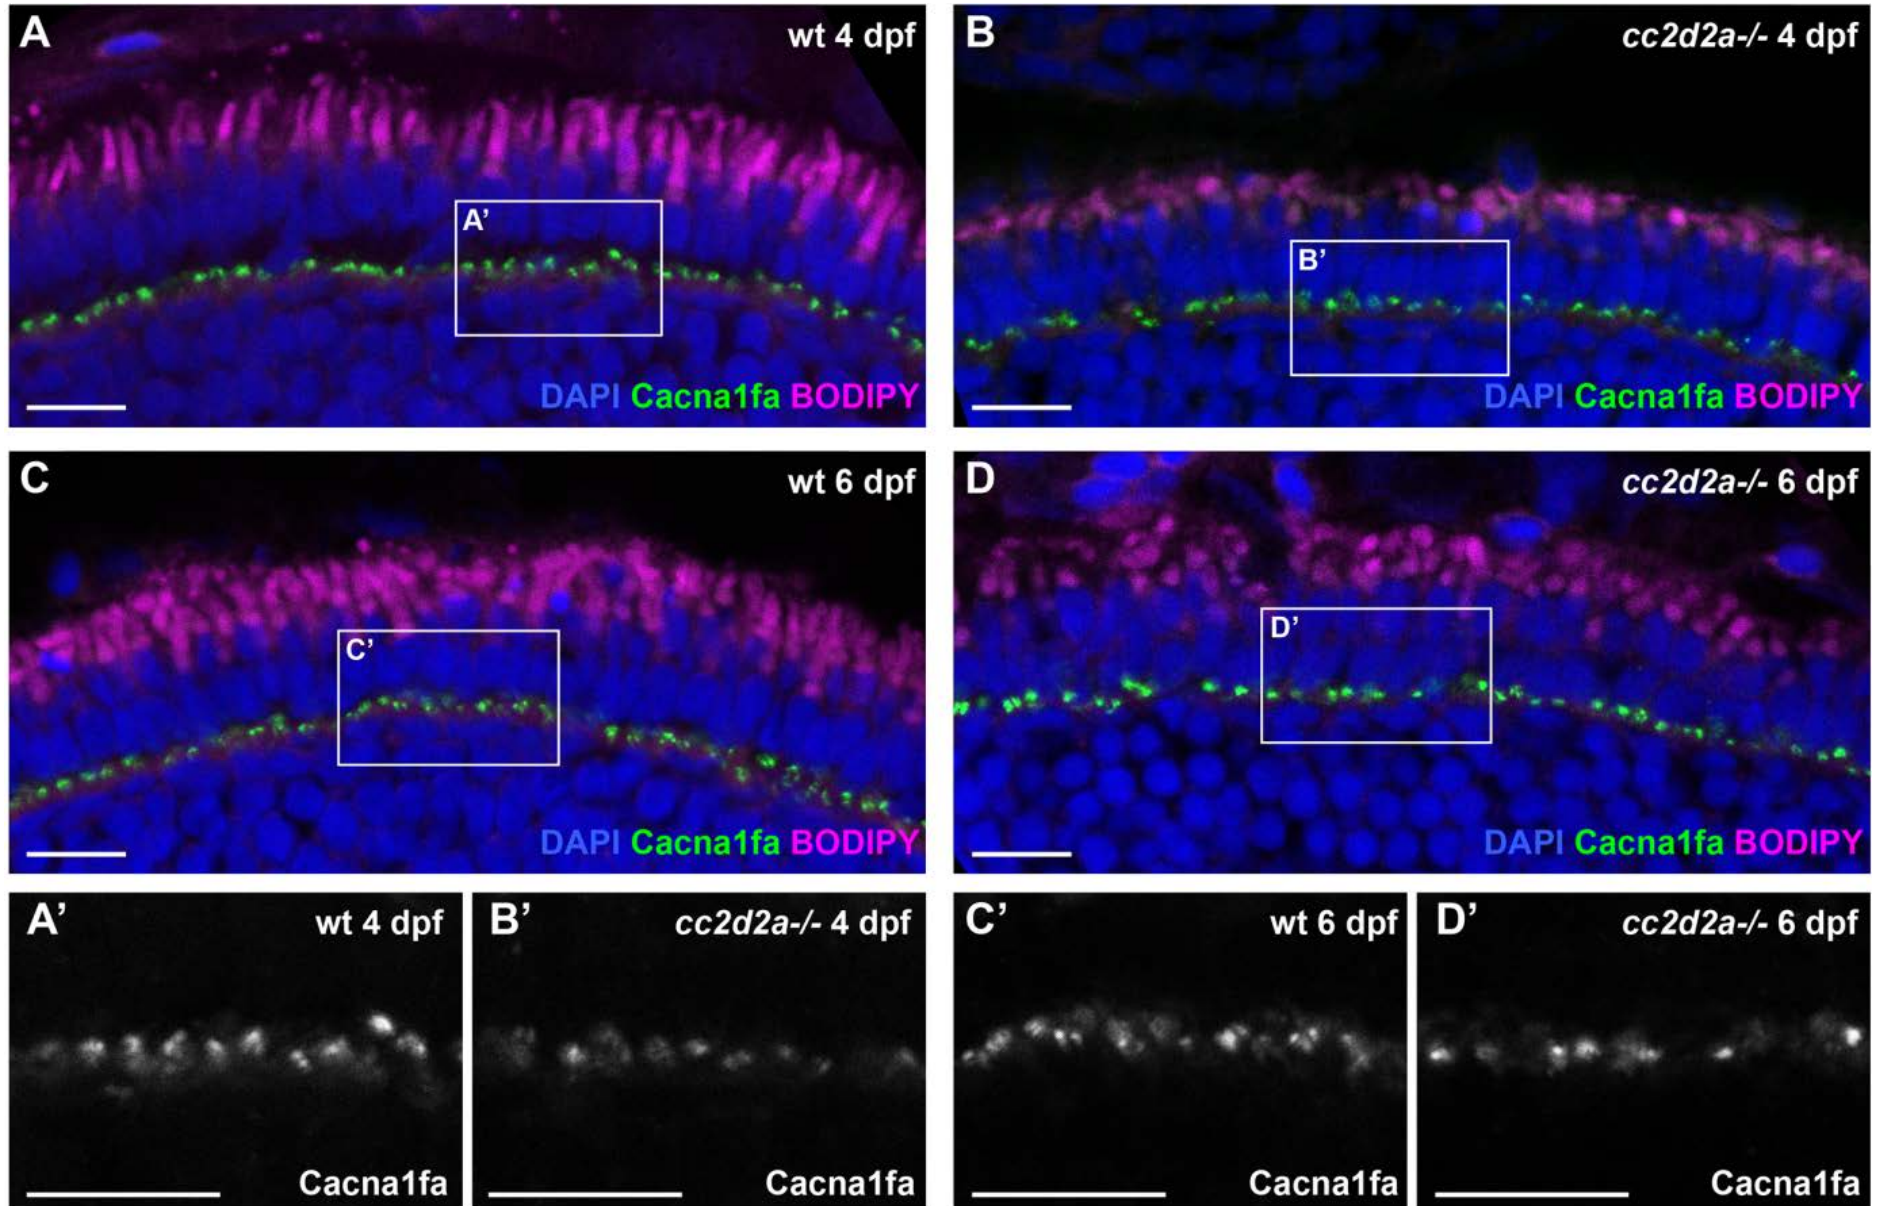

Supplement: pgen.1007150.s012.pdf [file pgen.1007150.s012.pdf]
