# Supplementary material for: Loss-of-function of the ciliopathy protein Cc2d2a disorganizes the vesicle fusion machinery at the periciliary membrane and indirectly affects Rab8-trafficking in zebrafish photoreceptors
Source: PubMed Central journal article supplement (PMC5760100; doi:10.1371/journal.pgen.1007150), 2017-12-27

S8 Fig. Comparison of transgenic Rab8 expression with endogenous Rab8 localization

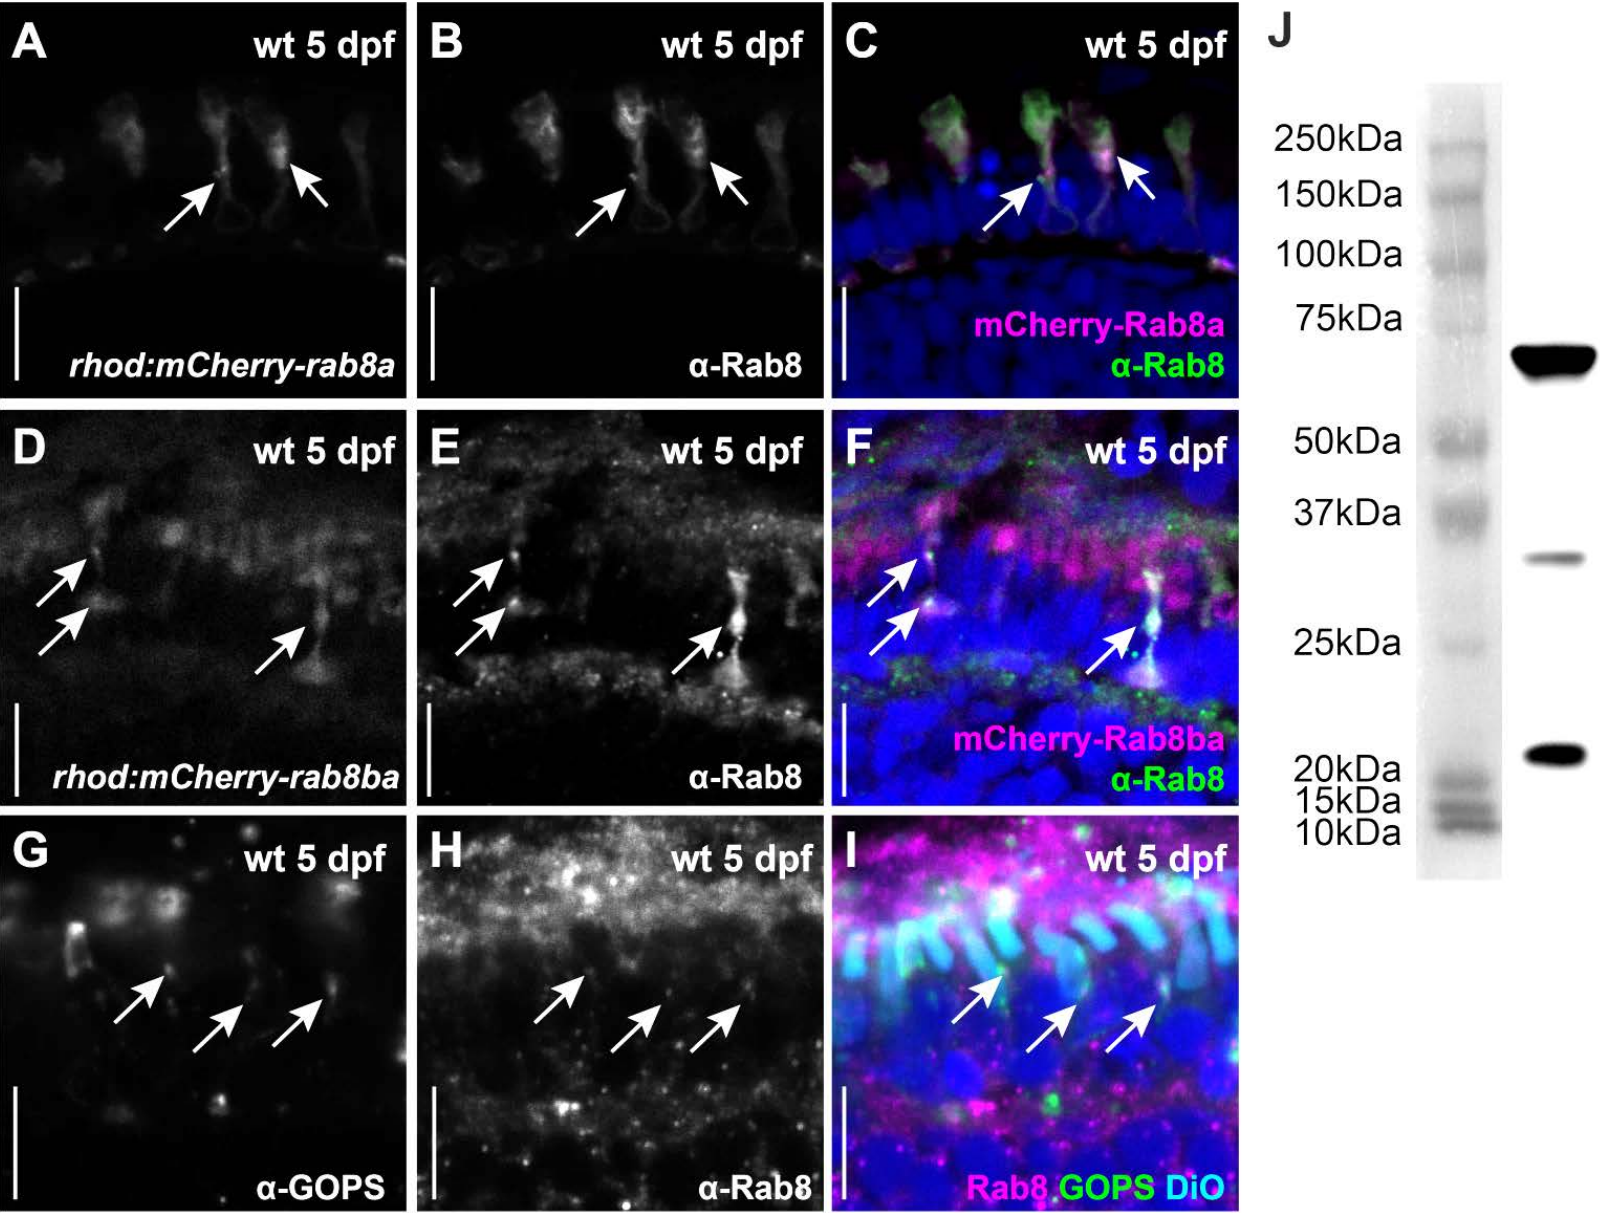

Supplement: pgen.1007150.s016.pdf [file pgen.1007150.s016.pdf]
