# Supplementary material for: Loss-of-function of the ciliopathy protein Cc2d2a disorganizes the vesicle fusion machinery at the periciliary membrane and indirectly affects Rab8-trafficking in zebrafish photoreceptors
Source: PubMed Central journal article supplement (PMC5760100; doi:10.1371/journal.pgen.1007150), 2017-12-27

S11 Fig. Comparison of *cc2d2a* and *ift88* mutant retinæ indicates that vesicle accumulation in PRs is not a general non-specific defect secondary to any ciliary dysfunction

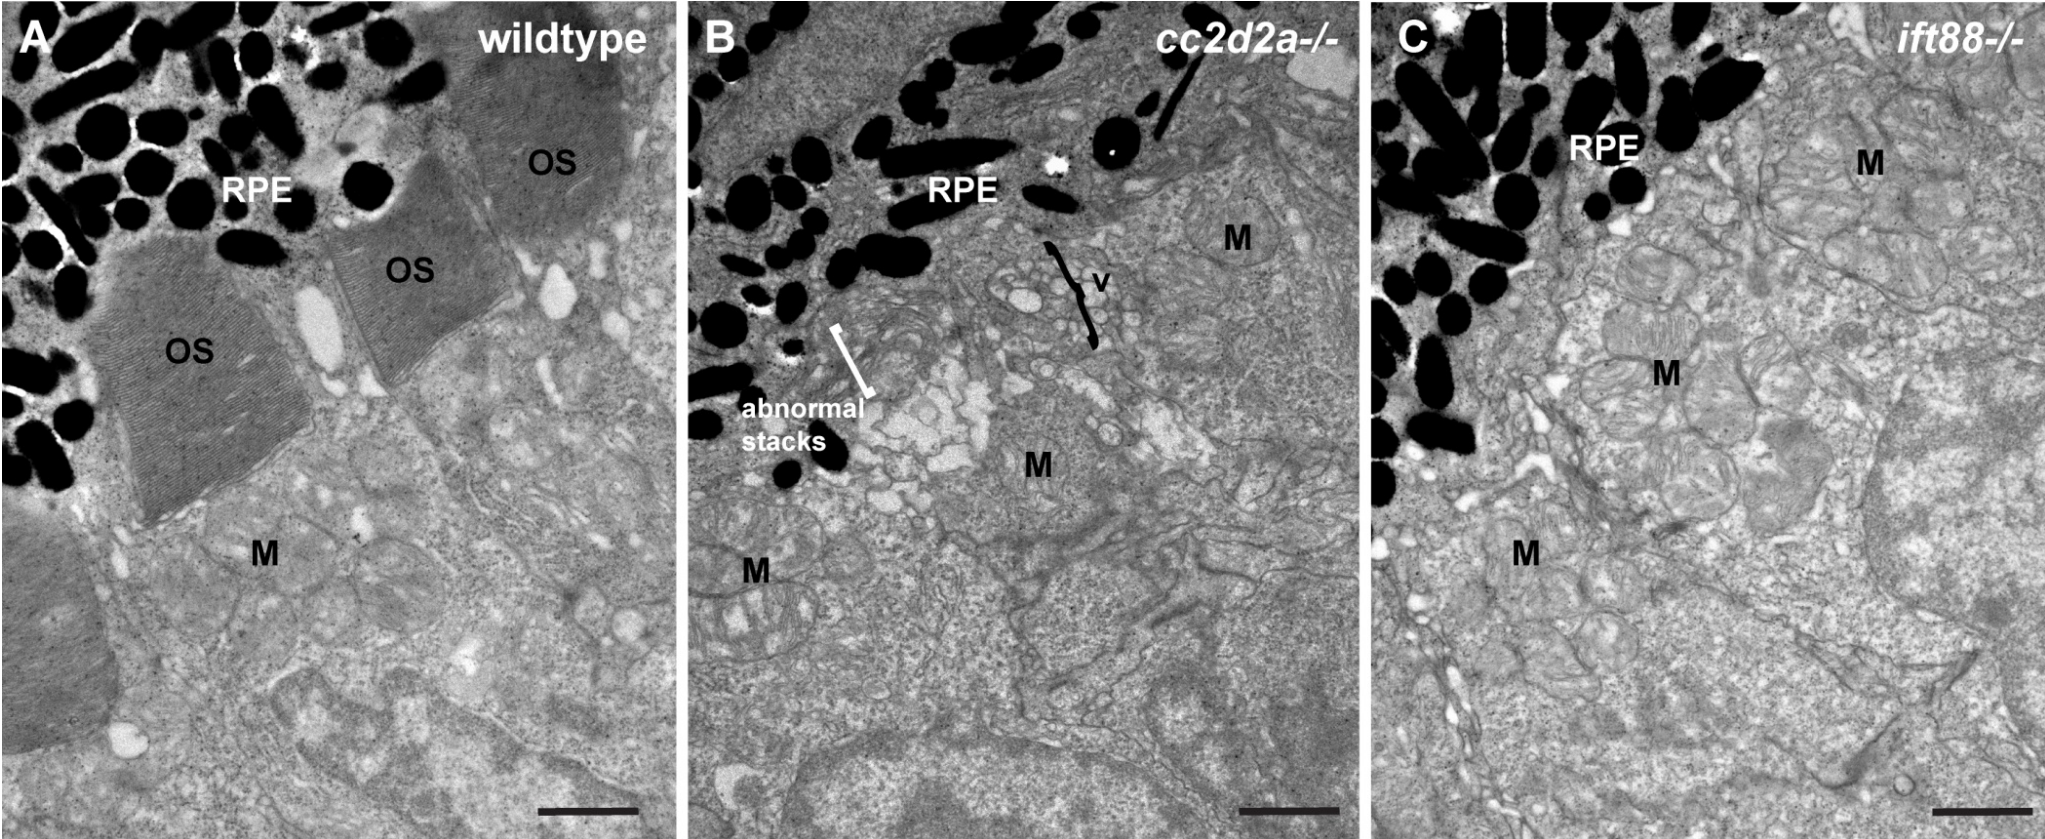

Supplement: pgen.1007150.s019.pdf [file pgen.1007150.s019.pdf]
